# Supplementary material
Source: PubMed Central journal article supplement (PMC3417497)
Supplement: bph0166-0676-SD1.pdf [file bph0166-0676-SD1.pdf]

# Figure S

## S1

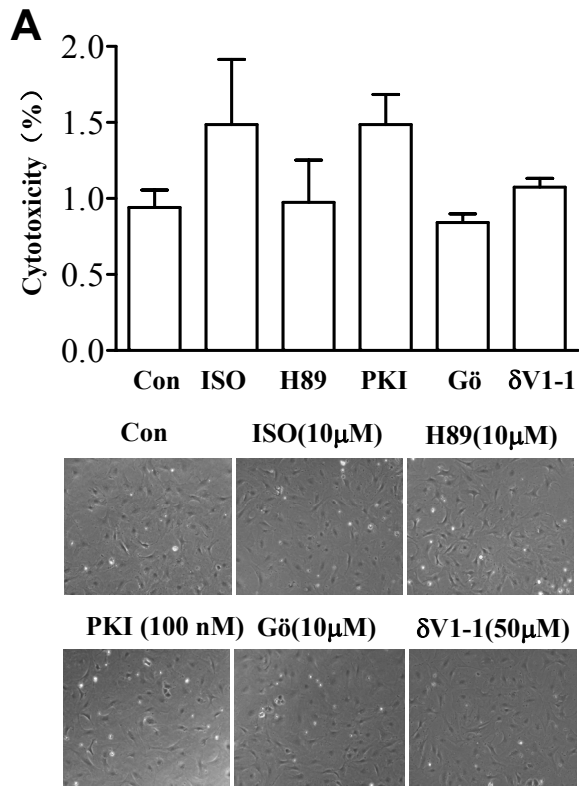

## B

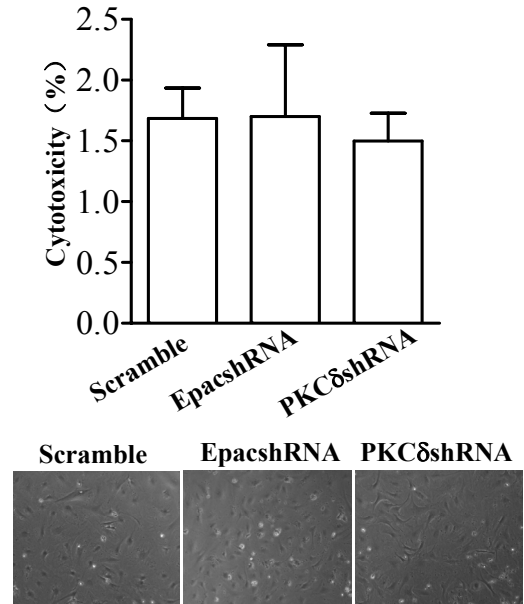

## S2

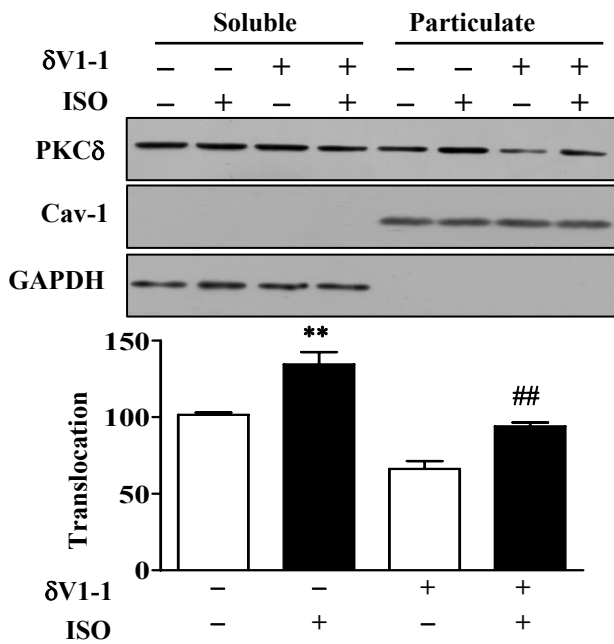

## S3

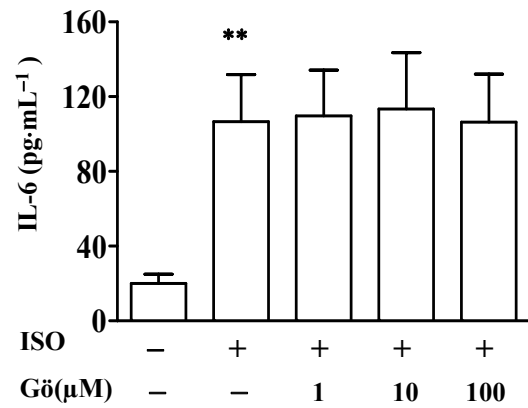

# Figure S

## S4

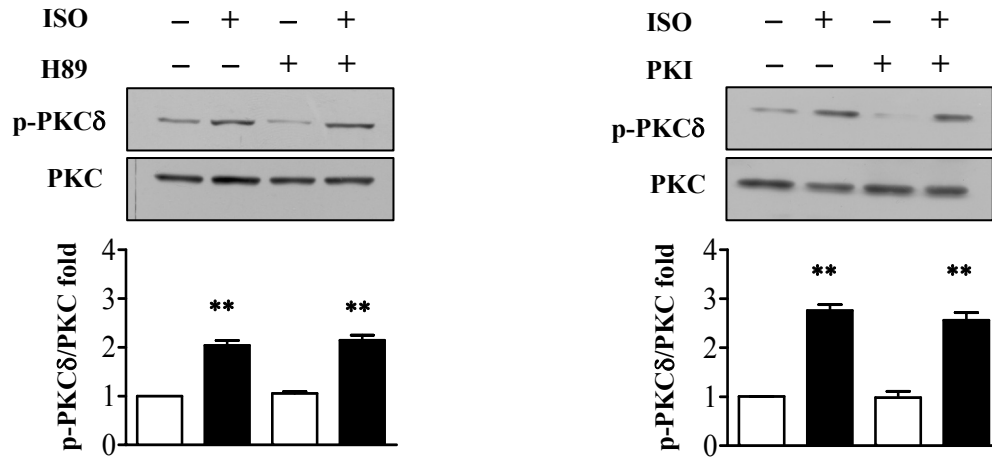

## S5

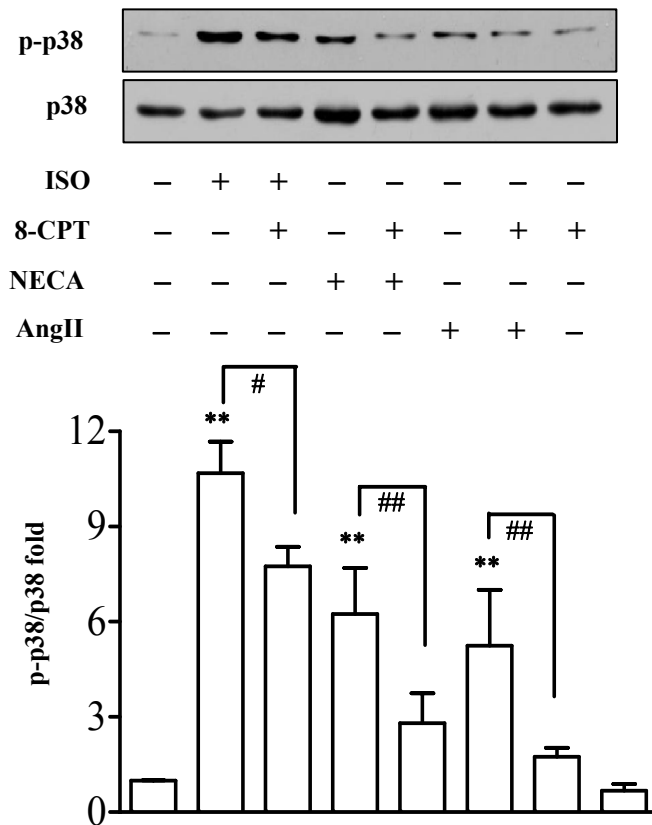

Figure S1. Cytotoxic effects of various kinase inhibitors and adenovirus infection. (A) NMCFs were incubated with various kinase inhibitors used in the experiments. LDH in the supernatant was measured and cytotoxicity rate was calculated. n=3. A representative image of each treatment from three independent experiments is shown in the below. (B) NMCFs were infected with adenovirus expressing Epac-shRNA, PKC $\delta$ -shRNA or scramble RNA. LDH in the supernatant was measured and cytotoxicity rate was calculated. n=3. A representative image of each treatment from three independent experiments was shown. All the images were collected at 100 fold magnification; All the treated cells showed no significant difference comparing with control group.

Figure S2. ISO-induced PKC $\delta$  translocation is inhibited by PKC $\delta$  translocation inhibitor. (Upper) NMCFs were pre-incubated with PKC $\delta$  translocation inhibitor ( $\delta$ V1-1;5  $\mu$ M) for 30 min, then stimulated with ISO (10  $\mu$ M) for 5 min, cell lysates were separated into soluble and particulate fractions, PKC $\delta$  translocation was quantified by western blot. A representative image from three independent experiments was shown. (Lower) Mean  $\pm$  SEM of data from three independent experiments. \*\* $p$ <0.01 ISO vs Con. ### $p$ <0.01 ISO+ $\delta$ V1-1 vs ISO. n=3.

Figure S3. PKC $\alpha/\beta$  is not involved in ISO-induced IL-6 production. NMCFs were pre-incubated with Gö 6976 for 30 min, then stimulated with ISO (10  $\mu$ M) for 12 hr, IL-6 in the supernatant was determined by ELISA. \*\* $p$ <0.01 ISO vs Con. n=3.

Figure S4. PKA is not involved in ISO-induced PKC $\delta$  phosphorylation. NMCFs were pre-incubated with H-89 (10  $\mu$ M) for 30 min (left) or PKI (100 nM) for 30 min (right), then stimulated with ISO (10  $\mu$ M) for 15 min, PKC $\delta$  phosphorylation was measured by western blot. A representative image from three independent experiments was shown. \*\* $p$ <0.01 ISO vs Con. n=3.

Figure S5. Activation of Epac by 8-pCPT inhibits p38 MAPK phosphorylation. NMCs were pre-incubated with 8-pCPT (50  $\mu$ M) for 30 min, then stimulated with ISO (10  $\mu$ M), Adenosine-5'-N-ethyluronamide (NECA) (1  $\mu$ M), Angiotensin II (AngII) (1  $\mu$ M) for 5 min. Cell lysates were immunoblotted with anti-phospho-p38 MAPK or anti-p38 MAPK antibody. A representative image from three independent experiments was shown. \*\* $p$ <0.01 ISO, NECA or AngII vs Con. # $p$ <0.05, 8-pCPT vs Con in ISO group. ## $p$ <0.01, 8-pCPT vs Con in NECA or AngII group. n=3.
